# Supplementary material
Source: PubMed Central journal article supplement (PMC5987749)

# Suppl. Figure 1

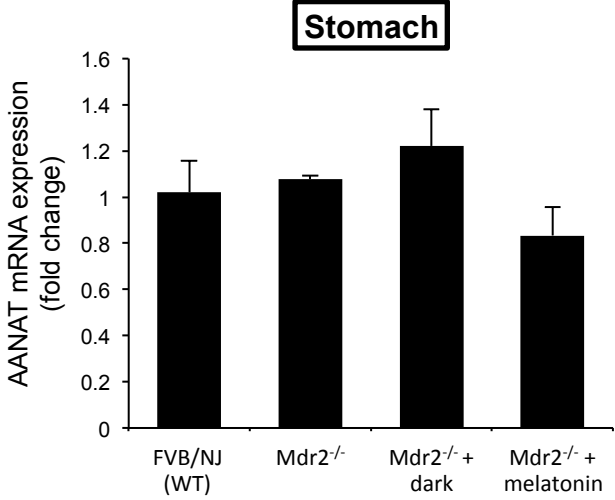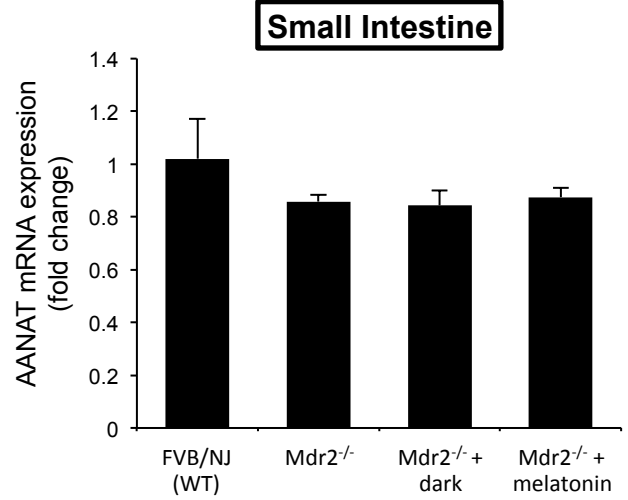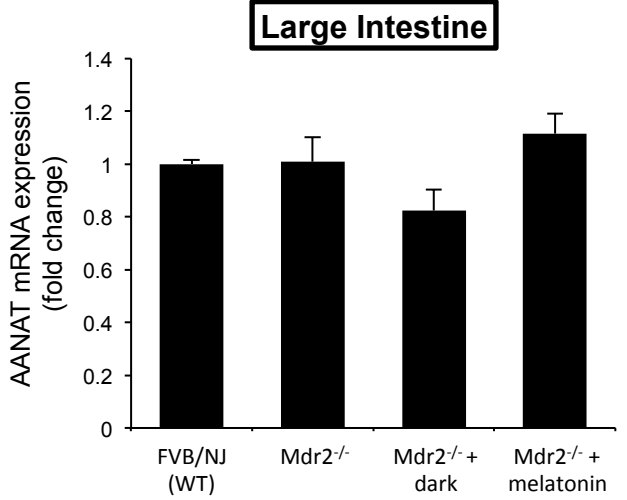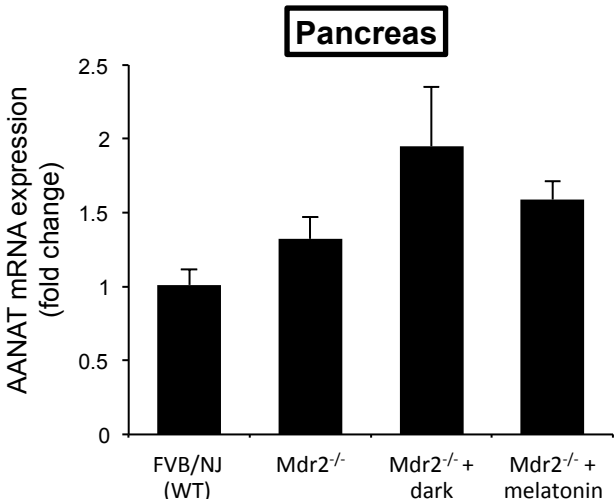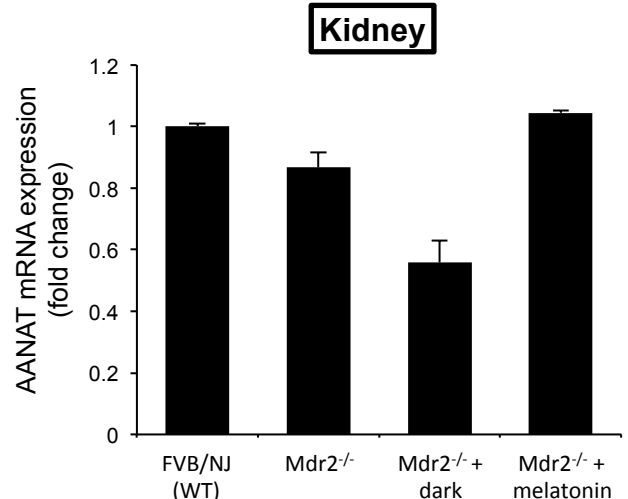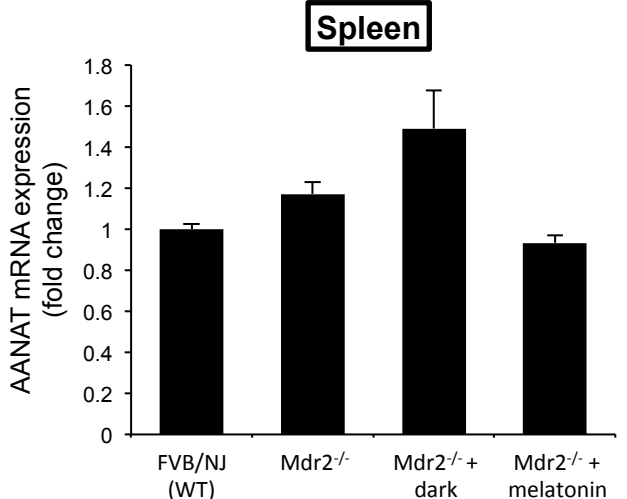

Supplement: fj.201700097R.sf1.pdf [file fj.201700097R.sf1.pdf]
